# Supplementary material for: Direct oxidation of amines to nitriles in the presence of ruthenium-terpyridyl complex immobilized on ILs/SILP
Source: Royal Society of Chemistry journal article supplement (doi:10.1039/c5cy00011d), 2015-01-01
Supplement: c5cy00011d1.pdf [file c5cy00011d1.pdf]

Supplementary informations

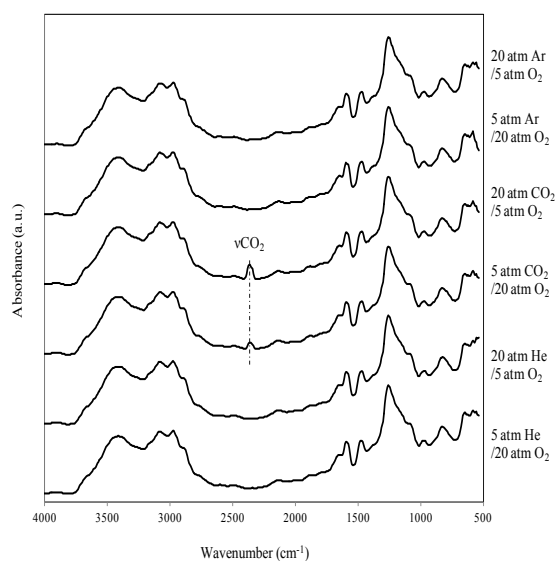

**Figure S11.** DRIFT spectra of SILP catalysts in various inert atmospheres

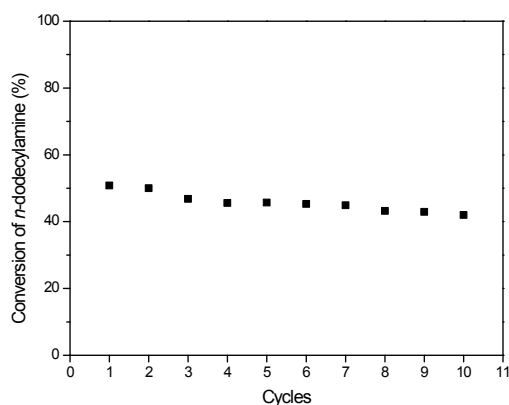

**Figure S12.** The activity of Ru<sub>2</sub>Cl<sub>4</sub>(az-tpy)<sub>2</sub> complex (SILP) (IL=[C<sub>4</sub>C<sub>1</sub>im][NTf<sub>2</sub>]) in oxidation of *n*-dodecyl amine as substrate (5 mL hexane as solvent; 5 h reaction time; 5 atm molecular oxygen) vs. number of cycles.
